# Supplementary material
Source: PubMed Central journal article supplement (PMC5328460)
Supplement: JCM.01990-16_zjm999095399s1.pdf [file JCM.01990-16_zjm999095399s1.pdf]

**Table S1: Identification of *S. pneumoniae* strains**

| strain # | Sero-type | 4613       |             | 5627       |             | List(score)    |   |   |    |            |
|----------|-----------|------------|-------------|------------|-------------|----------------|---|---|----|------------|
|          |           | best match | score value | best match | score value | species sorted |   |   |    | best match |
|          |           |            |             |            |             | p              | m | o | sp |            |
| 21542    | 15C       | pneumoniae | 2,38        | pneumoniae | 2,38        | 124            | 5 |   |    | pneumoniae |
| 21545    | 6B        | pneumoniae | 2,30        | pneumoniae | 2,30        | 120            | 2 |   |    | pneumoniae |
| 21559    | 4         | pneumoniae | 1,94        | pneumoniae | 1,99        | 104            |   |   |    | pneumoniae |
| 21561    | 4         | pneumoniae | 2,27        | pneumoniae | 2,33        | 124            |   |   |    | pneumoniae |
| 21590    | 35F       | pneumoniae | 2,26        | pneumoniae | 2,36        | 126            |   |   |    | pneumoniae |
| 21611    | 6B        | pneumoniae | 2,33        | pneumoniae | 2,33        | 126            |   |   |    | pneumoniae |
| 21633    | 18C       | pneumoniae | 2,30        | pneumoniae | 2,42        | 126            |   |   |    | pneumoniae |
| 21639    | 20        | pneumoniae | 2,16        | pneumoniae | 2,27        | 120            |   |   |    | pneumoniae |
| 21655    | 7F        | pneumoniae | 2,33        | pneumoniae | 2,47        | 124            | 9 |   |    | pneumoniae |
| 21676    | 19F       | pneumoniae | 2,18        | pneumoniae | 2,18        | 112            |   |   |    | pneumoniae |
| 21679    | 3         | pneumoniae | 2,01        | pneumoniae | 2,01        | 106            |   |   |    | pneumoniae |
| 21687    | 14        | pneumoniae | 2,27        | pneumoniae | 2,28        | 123            |   |   |    | pneumoniae |
| 21708    | 6A        | pneumoniae | 2,11        | pneumoniae | 2,11        | 112            |   |   |    | pneumoniae |
| 21800    | 23F       | pneumoniae | 2,28        | pneumoniae | 2,31        | 123            |   |   |    | pneumoniae |
| 21813    | 22F       | pneumoniae | 2,28        | pneumoniae | 2,38        | 127            |   |   |    | pneumoniae |
| 21819    | 5         | pneumoniae | 2,14        | pneumoniae | 2,23        | 119            |   |   |    | pneumoniae |
| 21844    | 7F        | pneumoniae | 1,72        | pneumoniae | 1,96        | 50             |   |   |    | pneumoniae |
| 21845    | 22F       | pneumoniae | 2,30        | pneumoniae | 2,38        | 127            |   |   |    | pneumoniae |
| 21858    | 18C       | pneumoniae | 2,37        | pneumoniae | 2,37        | 125            |   |   |    | pneumoniae |
| 21873    | 7F        | pneumoniae | 2,20        | pneumoniae | 2,34        | 123            |   |   |    | pneumoniae |
| 21874    | 14        | pneumoniae | 2,38        | pneumoniae | 2,38        | 123            | 5 |   |    | pneumoniae |
| 21875    | 6B        | pneumoniae | 2,01        | pneumoniae | 2,07        | 108            |   |   |    | pneumoniae |

|       |     |            |      |            |      |     |    |    |  |            |
|-------|-----|------------|------|------------|------|-----|----|----|--|------------|
| 21876 | 14  | pneumoniae | 2,42 | pneumoniae | 2,42 | 131 |    |    |  | pneumoniae |
| 21897 | 23F | pneumoniae | 2,26 | pneumoniae | 2,34 | 126 |    |    |  | pneumoniae |
| 21898 | 14  | pneumoniae | 2,30 | pneumoniae | 2,33 | 126 |    |    |  | pneumoniae |
| 21919 | 3   | pneumoniae | 2,17 | pneumoniae | 2,17 | 109 | 4  |    |  | pneumoniae |
| 21938 | 6B  | pneumoniae | 1,95 | pneumoniae | 2,00 | 104 |    |    |  | pneumoniae |
| 21944 | 22F | pneumoniae | 2,25 | pneumoniae | 2,35 | 89  | 36 |    |  | pneumoniae |
| 21954 | 18C | pneumoniae | 2,15 | pneumoniae | 2,15 | 117 |    |    |  | pneumoniae |
| 21954 | 18C | pneumoniae | 2,31 | pneumoniae | 2,31 | 125 |    |    |  | pneumoniae |
| 21960 | 4   | pneumoniae | 2,39 | pneumoniae | 2,39 | 130 |    |    |  | pneumoniae |
| 21960 | 4   | pneumoniae | 2,50 | pneumoniae | 2,54 | 137 |    |    |  | pneumoniae |
| 21974 | 18C | pneumoniae | 2,28 | pneumoniae | 2,28 | 116 | 6  |    |  | pneumoniae |
| 21974 | 18C | pneumoniae | 2,24 | pneumoniae | 2,42 | 124 | 5  |    |  | pneumoniae |
| 21977 | 3   | pneumoniae | 2,13 | pneumoniae | 2,13 | 110 |    |    |  | pneumoniae |
| 21979 | 19F | pneumoniae | 2,18 | pneumoniae | 2,18 | 112 | 2  |    |  | pneumoniae |
| 21979 | 19F | pneumoniae | 2,16 | pneumoniae | 2,16 | 116 |    |    |  | pneumoniae |
| 21988 | 3   | pneumoniae | 2,15 | pneumoniae | 2,15 | 107 | 2  | 4  |  | pneumoniae |
| 21999 | 3   | pneumoniae | 1,97 | pneumoniae | 2,04 | 106 |    |    |  | pneumoniae |
| 21999 | 3   | pneumoniae | 2,40 | pneumoniae | 2,46 | 129 |    |    |  | pneumoniae |
| 22008 | 6B  | pneumoniae | 2,12 | pneumoniae | 2,12 | 111 | 2  |    |  | pneumoniae |
| 22008 | 6B  | pneumoniae | 2,34 | pneumoniae | 2,42 | 129 |    |    |  | pneumoniae |
| 22015 | 14  | pneumoniae | 2,31 | pneumoniae | 2,31 | 116 | 4  |    |  | pneumoniae |
| 22015 | 14  | pneumoniae | 2,41 | pneumoniae | 2,53 | 136 |    |    |  | pneumoniae |
| 22019 | 6B  | pneumoniae | 1,97 | pneumoniae | 1,97 | 102 |    |    |  | pneumoniae |
| 22019 | 6B  | pneumoniae | 2,24 | pneumoniae | 2,24 | 106 |    | 10 |  | pneumoniae |
| 22035 | 11C | pneumoniae | 2,33 | pneumoniae | 2,33 | 124 |    |    |  | pneumoniae |
| 22035 | 11C | pneumoniae | 2,39 | pneumoniae | 2,40 | 128 |    |    |  | pneumoniae |

|       |     |            |      |            |      |     |    |    |  |            |
|-------|-----|------------|------|------------|------|-----|----|----|--|------------|
| 22038 | 22F | pneumoniae | 2,26 | pneumoniae | 2,42 | 128 |    |    |  | pneumoniae |
| 22038 | 22F | pneumoniae | 2,42 | pneumoniae | 2,57 | 138 |    |    |  | pneumoniae |
| 22044 | 6A  | pneumoniae | 2,27 | pneumoniae | 2,27 | 116 |    | 6  |  | pneumoniae |
| 22044 | 6A  | pneumoniae | 2,39 | pneumoniae | 2,41 | 130 |    |    |  | pneumoniae |
| 22048 | 6B  | pneumoniae | 2,35 | pneumoniae | 2,45 | 128 |    |    |  | pneumoniae |
| 22048 | 6B  | pneumoniae | 2,42 | pneumoniae | 2,44 | 132 |    |    |  | pneumoniae |
| 22063 | 23F | pneumoniae | 2,14 | pneumoniae | 2,28 | 119 |    |    |  | pneumoniae |
| 22063 | 23F | pneumoniae | 2,44 | pneumoniae | 2,48 | 134 |    |    |  | pneumoniae |
| 22068 | 7F  | pneumoniae | 2,29 | pneumoniae | 2,42 | 129 |    |    |  | pneumoniae |
| 22068 | 7F  | pneumoniae | 2,50 | pneumoniae | 2,56 | 137 |    |    |  | pneumoniae |
| 22069 | 33  | pneumoniae | 2,26 | pneumoniae | 2,30 | 122 |    |    |  | pneumoniae |
| 22069 | 33  | pneumoniae | 2,40 | pneumoniae | 2,44 | 132 |    |    |  | pneumoniae |
| 22074 | 6A  | pneumoniae | 2,33 | pneumoniae | 2,39 | 129 |    |    |  | pneumoniae |
| 22074 | 6A  | pneumoniae | 2,33 | pneumoniae | 2,33 | 125 |    |    |  | pneumoniae |
| 22084 | 6B  | pneumoniae | 1,86 | pneumoniae | 1,86 | 61  | 17 | 11 |  | pneumoniae |
| 22084 | 6B  | pneumoniae | 2,24 | pneumoniae | 2,24 | 120 |    |    |  | pneumoniae |
| 22089 | 14  | pneumoniae | 2,34 | pneumoniae | 2,34 | 126 |    |    |  | pneumoniae |
| 22089 | 14  | pneumoniae | 2,34 | pneumoniae | 2,53 | 132 |    |    |  | pneumoniae |
| 22092 | 16  | pneumoniae | 2,20 | pneumoniae | 2,20 | 112 |    |    |  | pneumoniae |
| 22092 | 16  | pneumoniae | 2,33 | pneumoniae | 2,33 | 122 |    |    |  | pneumoniae |
| 22094 | 22F | pneumoniae | 2,41 | pneumoniae | 2,41 | 128 |    |    |  | pneumoniae |
| 22094 | 22F | pneumoniae | 2,29 | pneumoniae | 2,30 | 124 |    |    |  | pneumoniae |
| 22099 | 19A | pneumoniae | 2,23 | pneumoniae | 2,28 | 122 |    |    |  | pneumoniae |
| 22099 | 19A | pneumoniae | 2,40 | pneumoniae | 2,40 | 127 |    |    |  | pneumoniae |
| 22101 | 8   | pneumoniae | 2,17 | pneumoniae | 2,37 | 122 |    |    |  | pneumoniae |
| 22101 | 8   | pneumoniae | 2,23 | pneumoniae | 2,39 | 123 |    |    |  | pneumoniae |

|       |     |            |      |            |      |     |    |   |            |
|-------|-----|------------|------|------------|------|-----|----|---|------------|
| 22118 | 3   | pneumoniae | 1,94 | pneumoniae | 1,94 | 86  | 11 | 5 | pneumoniae |
| 22118 | 3   | pneumoniae | 2,18 | pneumoniae | 2,22 | 120 |    |   | pneumoniae |
| 22119 | 22F | pneumoniae | 2,29 | pneumoniae | 2,36 | 126 |    |   | pneumoniae |
| 22119 | 22F | pneumoniae | 2,43 | pneumoniae | 2,50 | 135 |    |   | pneumoniae |
| 22120 | 23F | pneumoniae | 2,32 | pneumoniae | 2,39 | 127 |    |   | pneumoniae |
| 22120 | 23F | pneumoniae | 2,37 | pneumoniae | 2,40 | 130 |    |   | pneumoniae |
| 22122 | 14  | pneumoniae | 2,22 | pneumoniae | 2,39 | 127 |    |   | pneumoniae |
| 22122 | 14  | pneumoniae | 2,43 | pneumoniae | 2,50 | 133 |    |   | pneumoniae |
| 22141 | 14  | pneumoniae | 2,36 | pneumoniae | 2,36 | 127 |    |   | pneumoniae |
| 22141 | 14  | pneumoniae | 2,33 | pneumoniae | 2,48 | 131 |    |   | pneumoniae |
| 22143 | 22F | pneumoniae | 2,18 | pneumoniae | 2,29 | 124 |    |   | pneumoniae |
| 22143 | 22F | pneumoniae | 2,37 | pneumoniae | 2,55 | 137 |    |   | pneumoniae |
| 22160 | 19A | pneumoniae | 2,28 | pneumoniae | 2,28 | 122 |    |   | pneumoniae |
| 22160 | 19A | pneumoniae | 2,29 | pneumoniae | 2,29 | 123 |    |   | pneumoniae |
| 22180 | 4   | pneumoniae | 2,29 | pneumoniae | 2,32 | 123 |    |   | pneumoniae |
| 22180 | 4   | pneumoniae | 2,33 | pneumoniae | 2,38 | 125 |    |   | pneumoniae |
| 22200 | 22F | pneumoniae | 2,34 | pneumoniae | 2,39 | 127 |    |   | pneumoniae |
| 22200 | 22F | pneumoniae | 2,31 | pneumoniae | 2,49 | 131 |    |   | pneumoniae |
| 22289 | 23A | pneumoniae | 2,37 | pneumoniae | 2,37 | 126 |    |   | pneumoniae |
| 22289 | 23A | pneumoniae | 2,27 | pneumoniae | 2,42 | 129 |    |   | pneumoniae |
| 22304 | 23A | pneumoniae | 2,29 | pneumoniae | 2,29 | 120 |    |   | pneumoniae |
| 22304 | 23A | pneumoniae | 2,32 | pneumoniae | 2,36 | 127 |    |   | pneumoniae |
| 22334 | 14  | pneumoniae | 2,25 | pneumoniae | 2,33 | 125 |    |   | pneumoniae |
| 22334 | 14  | pneumoniae | 2,40 | pneumoniae | 2,40 | 130 |    |   | pneumoniae |
| 22339 | 6B  | pneumoniae | 2,16 | pneumoniae | 2,16 | 113 |    |   | pneumoniae |
| 22339 | 6B  | pneumoniae | 2,38 | pneumoniae | 2,38 | 128 |    |   | pneumoniae |

|       |     |            |      |            |      |     |  |  |  |            |
|-------|-----|------------|------|------------|------|-----|--|--|--|------------|
| 22355 | 9V  | pneumoniae | 2,33 | pneumoniae | 2,35 | 126 |  |  |  | pneumoniae |
| 22355 | 9V  | pneumoniae | 2,31 | pneumoniae | 2,42 | 128 |  |  |  | pneumoniae |
| 22367 | 14  | pneumoniae | 2,18 | pneumoniae | 2,41 | 126 |  |  |  | pneumoniae |
| 22367 | 14  | pneumoniae | 2,43 | pneumoniae | 2,47 | 133 |  |  |  | pneumoniae |
| 22379 | 4   | pneumoniae | 2,24 | pneumoniae | 2,28 | 122 |  |  |  | pneumoniae |
| 22379 | 4   | pneumoniae | 2,23 | pneumoniae | 2,23 | 115 |  |  |  | pneumoniae |
| 22387 | 9N  | pneumoniae | 2,25 | pneumoniae | 2,36 | 127 |  |  |  | pneumoniae |
| 22387 | 9N  | pneumoniae | 2,34 | pneumoniae | 2,48 | 129 |  |  |  | pneumoniae |
| 22417 | 9N  | pneumoniae | 2,36 | pneumoniae | 2,42 | 130 |  |  |  | pneumoniae |
| 22417 | 9N  | pneumoniae | 2,40 | pneumoniae | 2,43 | 130 |  |  |  | pneumoniae |
| 22421 | 9N  | pneumoniae | 2,31 | pneumoniae | 2,31 | 122 |  |  |  | pneumoniae |
| 22421 | 9N  | pneumoniae | 2,45 | pneumoniae | 2,47 | 133 |  |  |  | pneumoniae |
| 22431 | 15C | pneumoniae | 2,28 | pneumoniae | 2,28 | 124 |  |  |  | pneumoniae |
| 22431 | 15C | pneumoniae | 2,38 | pneumoniae | 2,38 | 128 |  |  |  | pneumoniae |
| 22434 | 22F | pneumoniae | 2,25 | pneumoniae | 2,29 | 124 |  |  |  | pneumoniae |
| 22434 | 22F | pneumoniae | 2,32 | pneumoniae | 2,43 | 129 |  |  |  | pneumoniae |
| 22440 | 4   | pneumoniae | 2,19 | pneumoniae | 2,36 | 120 |  |  |  | pneumoniae |
| 22440 | 4   | pneumoniae | 2,47 | pneumoniae | 2,47 | 132 |  |  |  | pneumoniae |
| 22479 | 10A | pneumoniae | 2,31 | pneumoniae | 2,41 | 128 |  |  |  | pneumoniae |
| 22479 | 10A | pneumoniae | 2,34 | pneumoniae | 2,48 | 131 |  |  |  | pneumoniae |
| 22513 | 7F  | pneumoniae | 2,40 | pneumoniae | 2,43 | 130 |  |  |  | pneumoniae |
| 22518 | 14  | pneumoniae | 2,29 | pneumoniae | 2,39 | 126 |  |  |  | pneumoniae |
| 22518 | 14  | pneumoniae | 2,34 | pneumoniae | 2,34 | 127 |  |  |  | pneumoniae |
| 22521 | 6C  | pneumoniae | 2,36 | pneumoniae | 2,40 | 129 |  |  |  | pneumoniae |
| 22521 | 6C  | pneumoniae | 2,42 | pneumoniae | 2,42 | 129 |  |  |  | pneumoniae |
| 22537 | 14  | pneumoniae | 2,43 | pneumoniae | 2,45 | 132 |  |  |  | pneumoniae |

|       |     |            |      |            |      |     |   |  |  |            |
|-------|-----|------------|------|------------|------|-----|---|--|--|------------|
| 22537 | 14  | pneumoniae | 2,28 | pneumoniae | 2,28 | 122 |   |  |  | pneumoniae |
| 22555 | 19A | pneumoniae | 2,28 | pneumoniae | 2,28 | 124 |   |  |  | pneumoniae |
| 22555 | 19A | pneumoniae | 2,35 | pneumoniae | 2,36 | 128 |   |  |  | pneumoniae |
| 22568 | 14  | pneumoniae | 2,37 | pneumoniae | 2,40 | 130 |   |  |  | pneumoniae |
| 22568 | 14  | pneumoniae | 2,38 | pneumoniae | 2,38 | 129 |   |  |  | pneumoniae |
| 22570 | 6B  | pneumoniae | 2,01 | pneumoniae | 2,14 | 112 |   |  |  | pneumoniae |
| 22606 | 4   | pneumoniae | 2,35 | pneumoniae | 2,49 | 130 |   |  |  | pneumoniae |
| 22615 | 14  | pneumoniae | 2,30 | pneumoniae | 2,36 | 126 |   |  |  | pneumoniae |
| 22615 | 14  | pneumoniae | 2,38 | pneumoniae | 2,50 | 135 |   |  |  | pneumoniae |
| 22619 | 14  | pneumoniae | 2,31 | pneumoniae | 2,31 | 124 |   |  |  | pneumoniae |
| 22619 | 14  | pneumoniae | 2,36 | pneumoniae | 2,50 | 136 |   |  |  | pneumoniae |
| 22649 | 22F | pneumoniae | 2,33 | pneumoniae | 2,44 | 129 |   |  |  | pneumoniae |
| 22649 | 22F | pneumoniae | 2,37 | pneumoniae | 2,39 | 130 |   |  |  | pneumoniae |
| 22654 | 14  | pneumoniae | 2,34 | pneumoniae | 2,34 | 124 |   |  |  | pneumoniae |
| 22654 | 14  | pneumoniae | 2,37 | pneumoniae | 2,45 | 131 |   |  |  | pneumoniae |
| 22662 | 8   | pneumoniae | 2,01 | pneumoniae | 2,12 | 103 | 8 |  |  | pneumoniae |
| 22662 | 8   | pneumoniae | 2,41 | pneumoniae | 2,52 | 133 |   |  |  | pneumoniae |
| 22668 | 19F | pneumoniae | 2,39 | pneumoniae | 2,42 | 130 |   |  |  | pneumoniae |
| 22688 | 6A  | pneumoniae | 2,29 | pneumoniae | 2,33 | 125 |   |  |  | pneumoniae |
| 22690 | 10  | pneumoniae | 2,37 | pneumoniae | 2,48 | 133 |   |  |  | pneumoniae |
| 22690 | 10  | pneumoniae | 2,32 | pneumoniae | 2,41 | 131 |   |  |  | pneumoniae |
| 22694 | 14  | pneumoniae | 2,42 | pneumoniae | 2,42 | 129 |   |  |  | pneumoniae |
| 22698 | 9V  | pneumoniae | 2,51 | pneumoniae | 2,51 | 135 |   |  |  | pneumoniae |
| 22698 | 9V  | pneumoniae | 2,40 | pneumoniae | 2,49 | 135 |   |  |  | pneumoniae |
| 22704 | 11A | pneumoniae | 2,23 | pneumoniae | 2,23 | 121 |   |  |  | pneumoniae |
| 22704 | 11A | pneumoniae | 2,21 | pneumoniae | 2,30 | 122 |   |  |  | pneumoniae |

|       |     |            |      |            |      |     |   |  |  |            |
|-------|-----|------------|------|------------|------|-----|---|--|--|------------|
| 22706 | 19F | pneumoniae | 2,33 | pneumoniae | 2,42 | 129 |   |  |  | pneumoniae |
| 23706 | 19F | pneumoniae | 2,48 | pneumoniae | 2,48 | 132 |   |  |  | pneumoniae |
| 22729 | 18C | pneumoniae | 2,34 | pneumoniae | 2,34 | 126 |   |  |  | pneumoniae |
| 22729 | 18C | pneumoniae | 2,48 | pneumoniae | 2,51 | 136 |   |  |  | pneumoniae |
| 22746 | 38  | pneumoniae | 2,18 | pneumoniae | 2,18 | 115 |   |  |  | pneumoniae |
| 22746 | 38  | pneumoniae | 2,36 | pneumoniae | 2,36 | 126 |   |  |  | pneumoniae |
| 22760 | 6B  | pneumoniae | 2,36 | pneumoniae | 2,36 | 126 |   |  |  | pneumoniae |
| 22782 | 14  | pneumoniae | 2,33 | pneumoniae | 2,37 | 129 |   |  |  | pneumoniae |
| 22782 | 14  | pneumoniae | 2,39 | pneumoniae | 2,47 | 134 |   |  |  | pneumoniae |
| 22783 | 22F | pneumoniae | 2,37 | pneumoniae | 2,40 | 130 |   |  |  | pneumoniae |
| 22783 | 22F | pneumoniae | 2,33 | pneumoniae | 2,41 | 129 |   |  |  | pneumoniae |
| 22794 | 3   | pneumoniae | 2,00 | pneumoniae | 2,00 | 104 |   |  |  | pneumoniae |
| 22794 | 3   | pneumoniae | 2,31 | pneumoniae | 2,38 | 128 |   |  |  | pneumoniae |
| 22798 | 15C | pneumoniae | 2,34 | pneumoniae | 2,40 | 129 |   |  |  | pneumoniae |
| 22798 | 15C | pneumoniae | 2,53 | pneumoniae | 2,56 | 139 |   |  |  | pneumoniae |
| 22815 | 22F | pneumoniae | 2,29 | pneumoniae | 2,44 | 131 |   |  |  | pneumoniae |
| 22820 | 14  | pneumoniae | 2,40 | pneumoniae | 2,45 | 131 |   |  |  | pneumoniae |
| 22820 | 14  | pneumoniae | 2,42 | pneumoniae | 2,53 | 135 |   |  |  | pneumoniae |
| 22823 | 22F | pneumoniae | 2,38 | pneumoniae | 2,50 | 135 |   |  |  | pneumoniae |
| 22829 | 19A | pneumoniae | 2,30 | pneumoniae | 2,33 | 125 |   |  |  | pneumoniae |
| 22829 | 19A | pneumoniae | 2,48 | pneumoniae | 2,54 | 138 |   |  |  | pneumoniae |
| 22831 | 22F | pneumoniae | 2,18 | pneumoniae | 2,37 | 127 |   |  |  | pneumoniae |
| 22842 | 23F | pneumoniae | 2,35 | pneumoniae | 2,42 | 125 | 7 |  |  | pneumoniae |
| 22843 | 9N  | pneumoniae | 2,32 | pneumoniae | 2,39 | 128 |   |  |  | pneumoniae |
| 22843 | 9N  | pneumoniae | 2,21 | pneumoniae | 2,29 | 124 |   |  |  | pneumoniae |
| 22849 | 14N | pneumoniae | 2,34 | pneumoniae | 2,42 | 131 |   |  |  | pneumoniae |

|       |     |            |      |            |      |     |    |   |  |            |
|-------|-----|------------|------|------------|------|-----|----|---|--|------------|
| 22873 | 6C  | pneumoniae | 1,84 | pneumoniae | 1,87 | 87  |    |   |  | pneumoniae |
| 22873 | 6C  | pneumoniae | 2,22 | pneumoniae | 2,34 | 121 |    |   |  | pneumoniae |
| 22881 | 6C  | pneumoniae | 2,02 | pneumoniae | 2,05 | 110 |    |   |  | pneumoniae |
| 22881 | 6C  | pneumoniae | 2,37 | pneumoniae | 2,39 | 129 |    |   |  | pneumoniae |
| 22908 | 6C  | pneumoniae | 1,86 | pneumoniae | 1,94 | 90  |    |   |  | pneumoniae |
| 22908 | 6C  | pneumoniae | 2,38 | pneumoniae | 2,38 | 129 |    |   |  | pneumoniae |
| 22927 | 14  | pneumoniae | 2,39 | pneumoniae | 2,43 | 133 |    |   |  | pneumoniae |
| 22927 | 14  | pneumoniae | 2,44 | pneumoniae | 2,47 | 134 |    |   |  | pneumoniae |
| 23001 | 3   | pneumoniae | 1,74 | pneumoniae | 1,76 | 33  |    |   |  | pneumoniae |
| 23051 | 7F  | pneumoniae | 2,26 | pneumoniae | 2,26 | 96  | 12 | 8 |  | pneumoniae |
| 23051 | 7F  | pneumoniae | 2,34 | pneumoniae | 2,50 | 136 |    |   |  | pneumoniae |
| 23054 | 9N  | pneumoniae | 2,28 | pneumoniae | 2,35 | 127 |    |   |  | pneumoniae |
| 23054 | 9N  | pneumoniae | 2,43 | pneumoniae | 2,59 | 139 |    |   |  | pneumoniae |
| 23072 | 6C  | pneumoniae | 2,04 | pneumoniae | 2,04 | 111 |    |   |  | pneumoniae |
| 23072 | 6C  | pneumoniae | 2,32 | pneumoniae | 2,38 | 127 |    |   |  | pneumoniae |
| 23074 | 23F | pneumoniae | 2,35 | pneumoniae | 2,52 | 133 |    |   |  | pneumoniae |
| 23074 | 23F | pneumoniae | 2,48 | pneumoniae | 2,54 | 138 |    |   |  | pneumoniae |
| 23079 | 4   | pneumoniae | 2,30 | pneumoniae | 2,35 | 124 |    |   |  | pneumoniae |
| 23079 | 4   | pneumoniae | 2,39 | pneumoniae | 2,53 | 132 |    |   |  | pneumoniae |
| 23088 | 19A | pneumoniae | 2,31 | pneumoniae | 2,41 | 130 |    |   |  | pneumoniae |
| 23088 | 19A | pneumoniae | 2,45 | pneumoniae | 2,53 | 129 | 5  |   |  | pneumoniae |
| 23097 | 10  | pneumoniae | 2,15 | pneumoniae | 2,17 | 115 |    |   |  | pneumoniae |
| 23097 | 10  | pneumoniae | 2,27 | pneumoniae | 2,38 | 129 |    |   |  | pneumoniae |
| 23099 | 14  | pneumoniae | 2,35 | pneumoniae | 2,39 | 129 |    |   |  | pneumoniae |
| 23099 | 14  | pneumoniae | 2,44 | pneumoniae | 2,51 | 135 |    |   |  | pneumoniae |
| 23170 | 4   | pneumoniae | 2,03 | pneumoniae | 2,09 | 109 |    | 2 |  | pneumoniae |



|       |     |            |      |            |      |     |  |  |  |            |
|-------|-----|------------|------|------------|------|-----|--|--|--|------------|
| 23170 | 4   | pneumoniae | 2,30 | pneumoniae | 2,36 | 125 |  |  |  | pneumoniae |
| 23173 | 11A | pneumoniae | 2,33 | pneumoniae | 2,35 | 124 |  |  |  | pneumoniae |
| 23173 | 11A | pneumoniae | 2,27 | pneumoniae | 2,36 | 124 |  |  |  | pneumoniae |
| 23198 | 7F  | pneumoniae | 2,38 | pneumoniae | 2,44 | 131 |  |  |  | pneumoniae |
| 23198 | 7F  | pneumoniae | 2,38 | pneumoniae | 2,38 | 125 |  |  |  | pneumoniae |
| 23200 | 23F | pneumoniae | 2,37 | pneumoniae | 2,40 | 130 |  |  |  | pneumoniae |
| 23200 | 23F | pneumoniae | 2,48 | pneumoniae | 2,54 | 136 |  |  |  | pneumoniae |
| 23211 | 3   | pneumoniae | 2,34 | pneumoniae | 2,36 | 128 |  |  |  | pneumoniae |
| 23215 | 8   | pneumoniae | 2,23 | pneumoniae | 2,23 | 119 |  |  |  | pneumoniae |
| 23215 | 8   | pneumoniae | 2,36 | pneumoniae | 2,40 | 130 |  |  |  | pneumoniae |
| 23237 | 22F | pneumoniae | 2,41 | pneumoniae | 2,45 | 131 |  |  |  | pneumoniae |
| 23237 | 22F | pneumoniae | 2,38 | pneumoniae | 2,47 | 131 |  |  |  | pneumoniae |
| 23246 | 4   | pneumoniae | 2,27 | pneumoniae | 2,29 | 121 |  |  |  | pneumoniae |
| 23246 | 4   | pneumoniae | 2,30 | pneumoniae | 2,43 | 130 |  |  |  | pneumoniae |
| 23251 | 15A | pneumoniae | 2,32 | pneumoniae | 2,32 | 126 |  |  |  | pneumoniae |
| 23251 | 15A | pneumoniae | 2,41 | pneumoniae | 2,50 | 132 |  |  |  | pneumoniae |
| 23287 | 9N  | pneumoniae | 2,27 | pneumoniae | 2,30 | 124 |  |  |  | pneumoniae |
| 23327 | 19F | pneumoniae | 2,34 | pneumoniae | 2,43 | 130 |  |  |  | pneumoniae |
| 23348 | 22F | pneumoniae | 2,41 | pneumoniae | 2,43 | 132 |  |  |  | pneumoniae |
| 23397 | 6B  | pneumoniae | 2,31 | pneumoniae | 2,36 | 125 |  |  |  | pneumoniae |
| 23399 | 14  | pneumoniae | 2,44 | pneumoniae | 2,58 | 137 |  |  |  | pneumoniae |
| 23402 | 6B  | pneumoniae | 2,41 | pneumoniae | 2,41 | 129 |  |  |  | pneumoniae |
| 23403 | 34  | pneumoniae | 2,42 | pneumoniae | 2,51 | 135 |  |  |  | pneumoniae |
| 23409 | 14  | pneumoniae | 2,35 | pneumoniae | 2,44 | 131 |  |  |  | pneumoniae |
| 23423 | 9N  | pneumoniae | 2,39 | pneumoniae | 2,44 | 132 |  |  |  | pneumoniae |
| 23464 | 8   | pneumoniae | 2,26 | pneumoniae | 2,26 | 120 |  |  |  | pneumoniae |

|       |     |            |      |            |      |     |   |  |  |            |
|-------|-----|------------|------|------------|------|-----|---|--|--|------------|
| 23483 | 11A | pneumoniae | 2,27 | pneumoniae | 2,27 | 121 |   |  |  | pneumoniae |
| 23540 | 19A | pneumoniae | 2,39 | pneumoniae | 2,43 | 133 |   |  |  | pneumoniae |
| 23564 | 8   | pneumoniae | 2,43 | pneumoniae | 2,51 | 134 |   |  |  | pneumoniae |
| 23583 | 6A  | pneumoniae | 2,43 | pneumoniae | 2,56 | 136 |   |  |  | pneumoniae |
| 23596 | 14  | pneumoniae | 2,39 | pneumoniae | 2,46 | 133 |   |  |  | pneumoniae |
| 23609 | 22F | pneumoniae | 2,37 | pneumoniae | 2,45 | 132 |   |  |  | pneumoniae |
| 23656 | 23F | pneumoniae | 2,41 | pneumoniae | 2,60 | 141 |   |  |  | pneumoniae |
| 23682 | 3   | pneumoniae | 2,46 | pneumoniae | 2,57 | 139 |   |  |  | pneumoniae |
| 23698 | 6A  | pneumoniae | 2,41 | pneumoniae | 2,48 | 133 |   |  |  | pneumoniae |
| 23790 | 15B | pneumoniae | 2,40 | pneumoniae | 2,45 | 133 |   |  |  | pneumoniae |
| 23928 | 4   | pneumoniae | 2,08 | pneumoniae | 2,08 | 109 |   |  |  | pneumoniae |
| 24000 | 6C  | pneumoniae | 2,14 | pneumoniae | 2,14 | 109 |   |  |  | pneumoniae |
| 24000 | 6C  | pneumoniae | 2,43 | pneumoniae | 2,55 | 136 |   |  |  | pneumoniae |
| 24021 | 23B | pneumoniae | 2,36 | pneumoniae | 2,37 | 128 |   |  |  | pneumoniae |
| 24021 | 23B | pneumoniae | 2,36 | pneumoniae | 2,50 | 133 |   |  |  | pneumoniae |
| 24035 | 22F | pneumoniae | 2,44 | pneumoniae | 2,44 | 130 |   |  |  | pneumoniae |
| 24035 | 22F | pneumoniae | 2,33 | pneumoniae | 2,48 | 134 |   |  |  | pneumoniae |
| 24041 | 19A | pneumoniae | 2,35 | pneumoniae | 2,35 | 127 |   |  |  | pneumoniae |
| 24041 | 19A | pneumoniae | 2,43 | pneumoniae | 2,50 | 136 |   |  |  | pneumoniae |
| 24048 | 9N  | pneumoniae | 2,36 | pneumoniae | 2,45 | 133 |   |  |  | pneumoniae |
| 24048 | 9N  | pneumoniae | 2,46 | pneumoniae | 2,59 | 139 |   |  |  | pneumoniae |
| 24056 | 6D  | pneumoniae | 2,43 | pneumoniae | 2,44 | 130 |   |  |  | pneumoniae |
| 24062 | 9V  | pneumoniae | 2,43 | pneumoniae | 2,60 | 139 |   |  |  | pneumoniae |
| 24063 | 9V  | pneumoniae | 2,30 | pneumoniae | 2,32 | 125 |   |  |  | pneumoniae |
| 24063 | 9V  | pneumoniae | 2,35 | pneumoniae | 2,43 | 123 | 4 |  |  | pneumoniae |
| 24076 | 23F | pneumoniae | 2,00 | pneumoniae | 2,04 | 110 |   |  |  | pneumoniae |

|       |     |            |      |            |      |     |   |    |  |            |
|-------|-----|------------|------|------------|------|-----|---|----|--|------------|
| 24076 | 23F | pneumoniae | 2,35 | pneumoniae | 2,42 | 131 |   |    |  | pneumoniae |
| 24086 | 19A | pneumoniae | 2,34 | pneumoniae | 2,34 | 126 |   |    |  | pneumoniae |
| 24086 | 19A | pneumoniae | 2,45 | pneumoniae | 2,45 | 132 |   |    |  | pneumoniae |
| 24088 | 7F  | pneumoniae | 2,39 | pneumoniae | 2,44 | 132 |   |    |  | pneumoniae |
| 24088 | 7F  | pneumoniae | 2,44 | pneumoniae | 2,61 | 141 |   |    |  | pneumoniae |
| 24096 | 3   | pneumoniae | 2,41 | pneumoniae | 2,48 | 131 |   |    |  | pneumoniae |
| 24106 | 3   | pneumoniae | 1,82 | pneumoniae | 1,82 | 49  |   |    |  | pneumoniae |
| 24106 | 3   | pneumoniae | 2,26 | pneumoniae | 2,27 | 124 |   |    |  | pneumoniae |
| 24175 | 20  | pneumoniae | 2,25 | pneumoniae | 2,35 | 126 |   |    |  | pneumoniae |
| 24175 | 20  | pneumoniae | 2,44 | pneumoniae | 2,45 | 132 |   |    |  | pneumoniae |
| 24201 | 6A  | pneumoniae | 2,38 | pneumoniae | 2,43 | 131 |   |    |  | pneumoniae |
| 24210 | 9N  | pneumoniae | 2,51 | pneumoniae | 2,51 | 133 |   |    |  | pneumoniae |
| 24212 | 11A | pneumoniae | 2,28 | pneumoniae | 2,47 | 120 | 4 |    |  | pneumoniae |
| 24219 | 9N  | pneumoniae | 2,37 | pneumoniae | 2,44 | 129 |   |    |  | pneumoniae |
| 24221 | 23A | no ID      | 1,68 | pneumoniae | 1,91 | 49  |   |    |  | pneumoniae |
| 24227 | 3   | pneumoniae | 2,20 | pneumoniae | 2,20 | 93  | 8 | 15 |  | pneumoniae |

4613= MALDI Biotyper database version 4613, 5627= MALDI Biotyper database version 5627,  $p$ = the sum of weighted matches to *S. pneumoniae* strains in the Biotyper database  $m$ = the sum of weighted matches to *S. mitis* strains in the Biotyper database,  $o$ = the sum of weighted matches to *S. oralis* strains in the Biotyper database,  $sp$ = the sum of weighted matches to other *S. mitis* group strains in the Biotyper database

**Table S2 Identification results for the non-pneumococcal mitis group strains**

| strain # | PyroSequencing Results                   | recA sequencing |                           |                 | DB_4613 log(score) |             | DB_5627 log(score) |             | DB_5627 list(score) |     |     |    | Best match |
|----------|------------------------------------------|-----------------|---------------------------|-----------------|--------------------|-------------|--------------------|-------------|---------------------|-----|-----|----|------------|
|          |                                          | %               | recA sequence result NCBI | BIBI prediction | best match         | score value | best match         | score value | species sorted      |     |     |    |            |
|          |                                          |                 |                           |                 |                    |             |                    |             | p                   | m   | o   | sp |            |
| 93       | mitis/oralis/pneumoniae/pseudopneumoniae | 99,8            | mitis                     | mitis           | pneumoniae         | 2,08        | mitis              | 2,45        | 9                   | 85  | 34  |    | mitis      |
| 512      | mitis/oralis/pneumoniae/pseudopneumoniae | 95,6            | mitis                     | mitis           | pneumoniae         | 2,02        | mitis              | 2,38        | 16                  | 73  | 35  |    | mitis      |
| 1530     | mitis/oralis/pneumoniae/pseudopneumoniae | 97              | mitis                     | mitis           | pneumoniae         | 1,85        | mitis              | 2,18        |                     | 81  | 32  |    | mitis      |
| 2227     | mitis/oralis/pneumoniae/pseudopneumoniae | 100             | mitis                     | mitis           | pneumoniae         | 2,01        | mitis              | 2,31        |                     | 84  | 37  |    | mitis      |
| 2359     | mitis/oralis/pneumoniae/pseudopneumoniae | 100             | mitis                     | mitis           | pneumoniae         | 2,00        | mitis              | 2,19        | 8                   | 109 |     |    | mitis      |
| 2790     | mitis/oralis/pneumoniae/pseudopneumoniae | 99,8            | oralis                    | oralis          | oralis             | 1,74        | oralis             | 2,24        |                     |     | 119 |    | oralis     |
| 2855     | mitis/oralis/pneumoniae/pseudopneumoniae | 99,6            | mitis                     | mitis           | pneumoniae         | 2,06        | mitis              | 2,30        |                     | 122 | 2   |    | mitis      |
| 3027     | mitis/oralis/pneumoniae/pseudopneumoniae | 99,6            | mitis                     | mitis           | pneumoniae         | 2,05        | mitis              | 2,22        | 15                  | 102 | 2   |    | mitis      |
| 3486     | mitis/oralis/pneumoniae/pseudopneumoniae | 99,8            | mitis                     | mitis           | pneumoniae         | 2,11        | mitis              | 2,27        | 11                  | 92  | 17  |    | mitis      |
| 3731     | mitis/oralis/pneumoniae/pseudopneumoniae | 96              | mitis                     | mitis           | pneumoniae         | 2,08        | oralis             | 2,19        | 30                  | 35  | 55  |    | oralis     |
| 3790     | mitis/oralis/pneumoniae/pseudopneumoniae | 96              | mitis                     | mitis           | oralis             | 1,85        | oralis             | 1,96        |                     | 36  | 67  |    | oralis     |
| 4291     | mitis/oralis/pneumoniae/pseudopneumoniae | 99,6            | mitis                     | mitis           | pneumoniae         | 2,24        | mitis              | 2,62        |                     | 120 | 17  |    | mitis      |
| 4387     | mitis/oralis/pneumoniae/pseudopneumoniae | 98,6            | oralis                    | oralis          | pneumoniae         | 1,84        | oralis             | 2,33        |                     | 9   | 114 |    | oralis     |
| 5115     | mitis/oralis/pneumoniae/pseudopneumoniae | 98,4            | oralis                    | oralis          | oralis             | 1,81        | oralis             | 2,25        |                     |     | 118 |    | oralis     |
| 7121     | mitis/oralis/pneumoniae/pseudopneumoniae | 99,8            | oralis                    | oralis          | oralis             | 2,03        | oralis             | 2,38        |                     | 5   | 123 |    | oralis     |
| 7441     | mitis/oralis/pneumoniae/pseudopneumoniae | 99,6            | mitis                     | mitis           | pneumoniae         | 2,24        | mitis              | 2,57        | 7                   | 127 |     |    | mitis      |
| 22593    | mitis/oralis/pneumoniae/pseudopneumoniae | 98,6            | mitis                     | mitis           | pneumoniae         | 2,11        | mitis              | 2,46        |                     | 89  | 42  |    | mitis      |
| 23446    | mitis/oralis/pneumoniae/pseudopneumoniae | 97,8            | mitis                     | mitis           | pneumoniae         | 2,08        | mitis              | 2,44        |                     | 89  | 36  |    | mitis      |
| 23478    | mitis/oralis/pneumoniae/pseudopneumoniae | n/a             | mitis/pneumoniae          | mitis           | pneumoniae         | 2,26        | mitis              | 2,49        | 7                   | 115 | 9   |    | mitis      |
| 23536    | mitis/oralis/pneumoniae/pseudopneumoniae | 98,8            | mitis                     | mitis           | pneumoniae         | 2,14        | mitis              | 2,48        | 9                   | 112 | 9   |    | mitis      |
| 23671    | mitis/oralis/pneumoniae/pseudopneumoniae | 98,4            | oralis                    | oralis          | oralis             | 2,03        | oralis             | 2,55        |                     |     | 135 |    | oralis     |
| 62381    | mitis/oralis/pneumoniae/pseudopneumoniae | 96,8            | mitis                     | pneumoniae      | pneumoniae         | 2,24        | mitis              | 2,50        | 19                  | 106 | 10  |    | mitis      |
| 62524    | mitis/oralis/pneumoniae/pseudopneumoniae | 99,8            | oralis                    | oralis          | pneumoniae         | 2,10        | oralis             | 2,57        |                     |     | 137 |    | oralis     |
| 62620    | mitis/oralis/pneumoniae/pseudopneumoniae | 98,4            | oralis                    | oralis          | oralis             | 2,05        | oralis             | 2,50        |                     |     | 135 |    | oralis     |
| 3002     | mitis                                    |                 |                           |                 | pneumoniae         | 2,06        | mitis              | 2,30        |                     | 90  | 33  |    | mitis      |
| 3130     | mitis                                    |                 |                           |                 | pneumoniae         | 2,06        | mitis              | 2,38        |                     | 92  | 34  |    | mitis      |
| 6301     | mitis                                    |                 |                           |                 | pneumoniae         | 1,94        | mitis              | 2,39        | 11                  | 112 | 5   |    | mitis      |
| 6772     | mitis                                    |                 |                           |                 | pneumoniae         | 2,12        | mitis              | 2,29        | 13                  | 87  | 22  |    | mitis      |

|       |                     |  |  |               |      |               |      |    |     |     |    |        |
|-------|---------------------|--|--|---------------|------|---------------|------|----|-----|-----|----|--------|
| 6893  | mitis               |  |  | pneumoniae    | 2,02 | mitis         | 2,38 | 25 | 99  | 2   |    | mitis  |
| 20319 | mitis               |  |  | pneumoniae    | 2,17 | mitis         | 2,39 | 7  | 75  | 46  |    | mitis  |
| 23844 | mitis               |  |  | pneumoniae    | 2,28 | mitis         | 2,47 | 9  | 93  | 31  |    | mitis  |
| 24136 | mitis               |  |  | pneumoniae    | 2,27 | mitis         | 2,42 | 28 | 62  | 40  |    | mitis  |
| 56925 | mitis               |  |  | pneumoniae    | 2,23 | mitis         | 2,41 |    | 92  | 38  |    | mitis  |
| 61209 | mitis               |  |  | pneumoniae    | 2,38 | mitis         | 2,41 | 19 | 100 | 12  |    | mitis  |
| 20542 | mitis/ oralis       |  |  | pneumoniae    | 2,00 | oralis        | 2,39 |    |     | 125 |    | oralis |
| 21429 | mitis/ infantis     |  |  | pneumoniae    | 1,94 | oralis        | 2,04 | 12 | 32  | 65  |    | oralis |
| 23816 | mitis/ oralis       |  |  | pneumoniae    | 2,25 | mitis         | 2,55 |    | 94  | 37  |    | mitis  |
| 23903 | mitis/ oralis       |  |  | pneumoniae    | 2,26 | oralis        | 2,53 |    | 35  | 101 |    | oralis |
| 24173 | mitis/ tigurinus    |  |  | S. gordonii   | 2,27 | S. gordonii   | 2,27 |    | 2   | 67  | 43 | oralis |
| 593   | oralis              |  |  | pneumoniae    | 1,89 | oralis        | 2,33 |    | 13  | 112 |    | oralis |
| 2028  | oralis              |  |  | pneumoniae    | 1,70 | oralis        | 2,21 |    | 17  | 101 |    | oralis |
| 2413  | oralis              |  |  | parasanguinis | 2,30 | parasanguinis | 2,30 |    |     |     | 41 | sp.    |
| 6584  | oralis              |  |  | pneumoniae    | 2,09 | oralis        | 2,38 |    | 20  | 106 |    | oralis |
| 23286 | oralis              |  |  | peroris       | 2,10 | peroris       | 2,10 | 38 | 48  |     | 21 | mitis  |
| 60009 | oralis              |  |  | oralis        | 2,01 | oralis        | 2,52 |    |     | 136 |    | oralis |
| 2805  | oralis/ gallinaceus |  |  | parasanguinis | 2,08 | parasanguinis | 2,08 |    |     |     | 37 | sp.    |
| 24170 | australis           |  |  | peroris       | 1,96 | mitis         | 2,11 |    | 44  | 69  |    | oralis |
| 3981  | dentisani           |  |  | pneumoniae    | 1,95 | mitis         | 2,55 |    | 124 | 9   |    | mitis  |
| 333   | infantis            |  |  | pneumoniae    | 2,00 | mitis         | 2,35 |    | 95  | 25  |    | mitis  |
| 371   | infantis            |  |  | pneumoniae    | 1,98 | mitis         | 2,32 |    | 117 | 7   |    | mitis  |
| 2803  | infantis            |  |  | pneumoniae    | 2,08 | mitis         | 2,45 |    | 48  | 81  |    | mitis  |
| 3263  | infantis            |  |  | oralis        | 1,99 | mitis         | 2,35 |    | 85  | 41  |    | mitis  |
| 7937  | infantis            |  |  | oralis        | 1,83 | oralis        | 2,16 |    |     | 114 |    | oralis |
| 8197  | infantis            |  |  | pneumoniae    | 2,15 | mitis         | 2,50 |    | 73  | 59  |    | mitis  |
| 21304 | infantis            |  |  | pneumoniae    | 2,23 | mitis         | 2,58 | 7  | 65  | 64  |    | mitis  |
| 23746 | infantis            |  |  | pneumoniae    | 2,14 | mitis         | 2,54 |    | 38  | 99  |    | oralis |
| 23798 | infantis            |  |  | pneumoniae    | 2,22 | oralis        | 2,51 |    | 46  | 88  |    | oralis |
| 24182 | infantis            |  |  | peroris       | 1,89 | peroris       | 1,89 | 12 | 16  | 14  | 19 | sp.    |
| 58429 | infantis            |  |  | pneumoniae    | 2,22 | mitis         | 2,67 | 2  | 116 | 20  |    | mitis  |
| 62680 | infantis            |  |  | pneumoniae    | 2,03 | pneumoniae    | 2,03 | 32 |     | 79  |    | oralis |
| 20837 | infantis/ cristatus |  |  | pneumoniae    | 2,24 | mitis         | 2,45 |    | 83  | 47  |    | mitis  |
| 23958 | infantis/ dentisani |  |  | pneumoniae    | 1,97 | mitis         | 2,37 | 6  | 46  | 69  |    | oralis |
| 62392 | infantis/ dentisani |  |  | pneumoniae    | 2,00 | oralis        | 2,46 |    |     | 130 |    | oralis |
| 2017  | tigurinus           |  |  | pneumoniae    | 1,98 | oralis        | 2,33 |    |     | 125 |    | oralis |
| 4168  | tigurinus           |  |  | oralis        | 1,82 | oralis        | 2,30 |    | 15  | 106 |    | oralis |
| 7696  | tigurinus           |  |  | oralis        | 1,83 | mitis         | 2,34 |    | 30  | 95  |    | oralis |
| 8029  | tigurinus           |  |  | pneumoniae    | 2,13 | oralis        | 2,57 |    | 27  | 109 |    | oralis |
| 21112 | tigurinus           |  |  | pneumoniae    | 2,05 | oralis        | 2,53 |    |     | 137 |    | oralis |
| 22682 | tigurinus           |  |  | pneumoniae    | 2,08 | oralis        | 2,53 |    |     | 136 |    | oralis |
| 23290 | tigurinus           |  |  | pneumoniae    | 2,02 | oralis        | 2,45 |    |     | 131 |    | oralis |
| 23513 | tigurinus           |  |  | pneumoniae    | 1,98 | oralis        | 2,45 |    |     | 129 |    | oralis |

|       |                      |  |  |               |      |               |      |    |    |     |     |        |
|-------|----------------------|--|--|---------------|------|---------------|------|----|----|-----|-----|--------|
| 23762 | tigurinus            |  |  | pneumoniae    | 2,15 | oralis        | 2,51 |    |    | 136 |     | oralis |
| 23799 | tigurinus            |  |  | pneumoniae    | 2,11 | oralis        | 2,56 |    |    | 137 |     | oralis |
| 21643 | sanguinis/ tigurinus |  |  | vestibularis  | 2,07 | vestibularis  | 2,07 |    |    |     | 78  | sp.    |
| 23795 | sanguinis/ tigurinus |  |  | pneumoniae    | 2,08 | oralis        | 2,28 |    | 6  | 116 |     | oralis |
| 59098 | sanguinis/ tigurinus |  |  | pneumoniae    | 1,86 | oralis        | 2,39 |    |    | 127 |     | oralis |
| 59664 | sanguinis/ tigurinus |  |  | pneumoniae    | 1,91 | oralis        | 2,47 |    |    | 133 |     | oralis |
| 61613 | sanguinis/ tigurinus |  |  | pneumoniae    | 2,01 | oralis        | 2,58 |    |    | 138 |     | oralis |
| 62407 | sanguinis/ tigurinus |  |  | pneumoniae    | 2,13 | oralis        | 2,21 |    | 23 | 76  | 19  | oralis |
| 195   | sanguinis            |  |  | sanguinis     | 2,24 | sanguinis     | 2,24 |    |    |     | 107 | sp.    |
| 4018  | sanguinis            |  |  | sanguinis     | 1,96 | sanguinis     | 1,96 |    |    |     | 122 | sp.    |
| 4627  | sanguinis            |  |  | sanguinis     | 2,34 | sanguinis     | 2,34 |    |    |     | 113 | sp.    |
| 5224  | sanguinis            |  |  | no ID         | 1,66 | oralis        | 2,25 |    | 10 | 72  | 31  | oralis |
| 5237  | sanguinis            |  |  | sanguinis     | 2,17 | sanguinis     | 2,17 |    |    |     | 84  | sp.    |
| 5360  | sanguinis            |  |  | pneumoniae    | 1,77 | oralis        | 2,37 |    |    |     | 111 | sp.    |
| 5664  | sanguinis            |  |  | sanguinis     | 2,31 | sanguinis     | 2,31 |    | 4  | 115 |     | oralis |
| 6202  | sanguinis            |  |  | sanguinis     | 2,28 | sanguinis     | 2,28 |    |    |     | 102 | sp.    |
| 7096  | sanguinis            |  |  | sanguinis     | 2,24 | sanguinis     | 2,24 |    | 21 | 107 |     | oralis |
| 7097  | sanguinis            |  |  | sanguinis     | 2,27 | sanguinis     | 2,27 |    |    |     | 109 | sp.    |
| 8072  | sanguinis            |  |  | sanguinis     | 2,18 | sanguinis     | 2,18 | 7  | 38 | 20  | 41  | sp.    |
| 21290 | sanguinis            |  |  | sanguinis     | 2,54 | sanguinis     | 2,54 |    |    |     | 127 | sp.    |
| 21356 | sanguinis            |  |  | sanguinis     | 2,29 | sanguinis     | 2,29 |    |    |     | 110 | sp.    |
| 23362 | sanguinis            |  |  | gordonii      | 2,09 | oralis        | 2,10 |    |    |     | 103 | sp.    |
| 58421 | sanguinis            |  |  | gordonii      | 2,18 | gordonii      | 2,18 |    |    |     | 110 | sp.    |
| 61447 | sanguinis            |  |  | sanguinis     | 2,61 | sanguinis     | 2,61 |    |    |     | 97  | sp.    |
| 62013 | parasanguinis        |  |  | parasanguinis | 2,35 | parasanguinis | 2,35 |    |    |     | 57  | sp.    |
| 3446  | gordonii             |  |  | gordonii      | 2,25 | gordonii      | 2,25 |    |    |     | 55  | sp.    |
| 6673  | gordonii             |  |  | gordonii      | 1,86 | gordonii      | 1,86 | 16 | 12 | 36  | 42  | sp.    |
| 22294 | gordonii             |  |  | gordonii      | 2,14 | gordonii      | 2,14 |    |    |     | 55  | sp.    |
| 22303 | gordonii             |  |  | gordonii      | 2,25 | gordonii      | 2,25 | 11 | 18 | 23  | 59  | sp.    |
| 59497 | gordonii             |  |  | gordonii      | 2,30 | gordonii      | 2,30 |    |    |     | 35  | sp.    |

4613= MALDI Biotyper database version 4613, 5627= MALDI Biotyper database version 5627, p= the sum of weighted matches to *S. pneumoniae* strains in the Biotyper database m= the sum of weighted matches to *S. mitis* strains in the Biotyper database, o= the sum of weighted matches to *S. oralis* strains in the Biotyper database, sp= the sum of weighted matches to other *S. mitis* group strains in the Biotyper database
